# Supplementary material for: Improving Treatment of Depression Among Latinos With Diabetes Using Project Dulce and IMPACT
Source: PubMed Central journal article supplement — Diabetes Care. 2008 Jul;31(7):1324–6. doi: 10.2337/dc08-0307 (PMC2453645; doi:10.2337/dc08-0307), 2008-07
Supplement: dc08-0307_1.pdf [file dc08-0307_1.pdf]

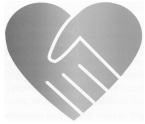

Project Dulce®

Patient Name: \_\_\_\_\_

ID:

Pre:

Post:

DOB:   /   /

Date:   /   /

Clinic Name: \_\_\_\_\_

ID:

MRN # \_\_\_\_\_

### Summary of Diabetes Self-Care Activities

**Instructions:** Thank you for taking the time to complete this! These questions below ask you about your diabetes self-care activities during the past 7 days. If you were sick during the past 7 days, please think back to the last 7 days that you were well. Please answer the questions honestly and accurately, select one answer per question and fill in the appropriate circle.

#### NUTRITION

|                                                                                                                                                                                                                                                                                                                                 |
|---------------------------------------------------------------------------------------------------------------------------------------------------------------------------------------------------------------------------------------------------------------------------------------------------------------------------------|
| 1. How often did you follow your recommended food plan over the last 7 days?<br><input type="radio"/> Always <input type="radio"/> Usually <input type="radio"/> Sometimes <input type="radio"/> Rarely <input type="radio"/> Never<br><input type="radio"/> I don't have a food plan diet                                      |
| 2. How often did you successfully limit your calories if recommended?<br><input type="radio"/> Always <input type="radio"/> Usually <input type="radio"/> Sometimes <input type="radio"/> Rarely <input type="radio"/> Never<br><input type="radio"/> I'm not sure what is recommended as healthy eating for diabetes control   |
| 3. During the past week, how often did your meals include high fiber foods, such as fresh fruits, fresh vegetables, whole grain breads, dried beans and peas, and bran?<br><input type="radio"/> Always <input type="radio"/> Usually <input type="radio"/> Sometimes <input type="radio"/> Rarely <input type="radio"/> Never  |
| 4. During the past week, how often did your meals include high fat foods such as butter, ice cream, oil, mayonnaise, salad dressing, bacon, other meat with fat or skin?<br><input type="radio"/> Always <input type="radio"/> Usually <input type="radio"/> Sometimes <input type="radio"/> Rarely <input type="radio"/> Never |
| 5. During the past week, how often did your meals include sweets and desserts such as pie, cake, jelly, soft drinks (with sugar), cookies?<br><input type="radio"/> Always <input type="radio"/> Usually <input type="radio"/> Sometimes <input type="radio"/> Rarely <input type="radio"/> Never                               |

#### EXERCISE

|                                                                                                                                                                                                                                                                                                                                                                                                             |
|-------------------------------------------------------------------------------------------------------------------------------------------------------------------------------------------------------------------------------------------------------------------------------------------------------------------------------------------------------------------------------------------------------------|
| 6. Of the last 7 days, how many days did you participate in 20 minutes or more of physical exercise?<br><input type="radio"/> None <input type="radio"/> 1 <input type="radio"/> 2 <input type="radio"/> 3 <input type="radio"/> 4 <input type="radio"/> 5 <input type="radio"/> 6 <input type="radio"/> 7                                                                                                  |
| 7. Of the last 7 days, how often did you exercise the amount suggested by your doctor or health care provider?<br><input type="radio"/> None <input type="radio"/> 1 <input type="radio"/> 2 <input type="radio"/> 3 <input type="radio"/> 4 <input type="radio"/> 5 <input type="radio"/> 6 <input type="radio"/> 7<br><input type="radio"/> My health care provider has not suggested an exercise program |
| 8. Of the last 7 days, how often did you participate in a specific exercise session other than what you do around the house or as a part of work?<br><input type="radio"/> None <input type="radio"/> 1 <input type="radio"/> 2 <input type="radio"/> 3 <input type="radio"/> 4 <input type="radio"/> 5 <input type="radio"/> 6 <input type="radio"/> 7                                                     |

#### GLUCOSE MONITORING

|                                                                                                                                                                                                                                                                                                                                                            |
|------------------------------------------------------------------------------------------------------------------------------------------------------------------------------------------------------------------------------------------------------------------------------------------------------------------------------------------------------------|
| 9. On how many of the last 7 days did you check your blood glucose level at least once?<br><input type="radio"/> Every day <input type="radio"/> Most days <input type="radio"/> Some days <input type="radio"/> Never                                                                                                                                     |
| 10. Over the last 7 days how often did you perform all the glucose monitoring recommended by your doctor or health care provider?<br><input type="radio"/> Every day <input type="radio"/> Most days <input type="radio"/> Some days <input type="radio"/> Never<br><input type="radio"/> My health care provider has not recommended I monitor my glucose |

#### DIABETES MEDICATION

|                                                                                                                                                                                                                                                                                                                         |
|-------------------------------------------------------------------------------------------------------------------------------------------------------------------------------------------------------------------------------------------------------------------------------------------------------------------------|
| 11. How many of your planned insulin injections did you take in the past 7 days?<br><input type="radio"/> All of them <input type="radio"/> Most of them <input type="radio"/> Some of them <input type="radio"/> None of them<br><input type="radio"/> I do not take insulin                                           |
| 12. How many of your recommended number of pills to control diabetes did you take in the past 7 days?<br><input type="radio"/> All of them <input type="radio"/> Most of them <input type="radio"/> Some of them <input type="radio"/> None of them<br><input type="radio"/> I do not take pills to control my diabetes |
