# Supplementary material for: Improving Treatment of Depression Among Latinos With Diabetes Using Project Dulce and IMPACT
Source: PubMed Central journal article supplement — Diabetes Care. 2008 Jul;31(7):1324–6. doi: 10.2337/dc08-0307 (PMC2453645; doi:10.2337/dc08-0307), 2008-07
Supplement: dc08-0307v2_2.pdf [file dc08-0307v2_2.pdf]

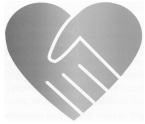

Project Dulce®

Patient Name: \_\_\_\_\_

ID:

Pre:

Post:

DOB:   /   /

Date:   /   /

Clinic Name: \_\_\_\_\_

ID:

MRN # \_\_\_\_\_

## RESUMEN DE LAS ACTIVIDADES PARA EL AUTO-CUIDADO DE LA DIABETES

**Instrucciones:** Gracias por tomarse el tiempo de contestar este cuestionario. Las siguientes serán preguntas acerca de sus actividades para el auto-cuidado de su diabetes en los últimos 7 días. Si usted estuvo enfermo(a) durante los últimos 7 días, por favor piense en 7 días consecutivos y anteriores en que estuvo bien de salud. Por favor conteste las preguntas honestamente y lo más preciso posible.

### NUTRICION

|                                                                                                                                                                                                                                                                                                                                                                                                            |
|------------------------------------------------------------------------------------------------------------------------------------------------------------------------------------------------------------------------------------------------------------------------------------------------------------------------------------------------------------------------------------------------------------|
| 1. ¿Qué tan constante fué en seguir su plan de alimentación recomendado durante los últimos 7 días?<br><input type="radio"/> Siempre <input type="radio"/> Casi siempre <input type="radio"/> A veces <input type="radio"/> Rara vez <input type="radio"/> Nunca<br><input type="radio"/> No tengo un plan de alimentación                                                                                 |
| 2. ¿Qué tan seguido logró limitar sus calorías, según las recomendaciones?<br><input type="radio"/> Siempre <input type="radio"/> Casi siempre <input type="radio"/> A veces <input type="radio"/> Rara vez <input type="radio"/> Nunca<br><input type="radio"/> No estoy segura cual es la recomendación para comer saludablemente en el control de la diabetes                                           |
| 3. La semana pasada, ¿qué tan seguido incluyó alimentos altos en fibra, como frutas y verduras frescas, panes de grano entero (pan integral) y cereales de trigo, frijoles, y chícharos?<br><input type="radio"/> Siempre <input type="radio"/> Casi siempre <input type="radio"/> A veces <input type="radio"/> Rara vez <input type="radio"/> Nunca                                                      |
| 4. La semana pasada, ¿qué tan seguido incluyeron alimentos altos en grasas como mantequilla, helado, aceite, nueces y semillas, mayonesa, aguacate, alimentos fritos, aderezo, tocino, otro tipo de carne con grasa o pellejo en sus comidas?<br><input type="radio"/> Siempre <input type="radio"/> Casi siempre <input type="radio"/> A veces <input type="radio"/> Rara vez <input type="radio"/> Nunca |
| 5. La semana pasada, ¿qué tan seguido incluyo dulces, postres como pastel, cake, gelatina, refrescos, (refrescos normales, no dietéticos) y galletas en sus comidas?<br><input type="radio"/> Siempre <input type="radio"/> Casi siempre <input type="radio"/> A veces <input type="radio"/> Rara vez <input type="radio"/> Nunca                                                                          |

### EJERCICIO

|                                                                                                                                                                                                                                                                                                                                                                                                                                                                           |
|---------------------------------------------------------------------------------------------------------------------------------------------------------------------------------------------------------------------------------------------------------------------------------------------------------------------------------------------------------------------------------------------------------------------------------------------------------------------------|
| 6. En los últimos 7 días, ¿que tan seguido hizo usted ejercicio físico por lo menos 20 minutos?<br><input type="radio"/> Ninguno <input type="radio"/> 1 <input type="radio"/> 2 <input type="radio"/> 3 <input type="radio"/> 4 <input type="radio"/> 5 <input type="radio"/> 6 <input type="radio"/> 7                                                                                                                                                                  |
| 7. En los últimos 7 días, ¿qué tan seguido se dedicó a un tipo de ejercicio sugerido por su Doctor? (Por ejemplo, si su Doctor le recomendó 30 minutos de ejercicio)<br><input type="radio"/> Ninguno <input type="radio"/> 1 <input type="radio"/> 2 <input type="radio"/> 3 <input type="radio"/> 4 <input type="radio"/> 5 <input type="radio"/> 6 <input type="radio"/> 7<br><input type="radio"/> Contesté auqi solo si su doctor nunca le recomendo hacer ejercicio |
| 8. En los últimos 7 días ¿qué tan seguido hizo usted ejercicio distinto al que hace en casa o como parte del trabajo?<br><input type="radio"/> Ninguno <input type="radio"/> 1 <input type="radio"/> 2 <input type="radio"/> 3 <input type="radio"/> 4 <input type="radio"/> 5 <input type="radio"/> 6 <input type="radio"/> 7                                                                                                                                            |

### ANALISIS DE GLUCOSA

|                                                                                                                                                                                                                                                                                                                                                                                                                              |
|------------------------------------------------------------------------------------------------------------------------------------------------------------------------------------------------------------------------------------------------------------------------------------------------------------------------------------------------------------------------------------------------------------------------------|
| 9. ¿Cuántos de los últimos 7 días (que usted no estuvo enfermo) se analizó su nivel de glucosa (azúcar en la sangre) por lo menos una vez?<br><input type="radio"/> Todos los días <input type="radio"/> Casi todos los días <input type="radio"/> Algunos días <input type="radio"/> Ningún día                                                                                                                             |
| 10. Durante los últimos 7 días (que usted no estuvo enfermo), ¿qué tan seguido se hizo los análisis de glucosa (azúcar en la sangre) recomendados por su doctor?<br><input type="radio"/> Todos los días <input type="radio"/> Casi todos los días <input type="radio"/> Algunos días <input type="radio"/> Ningún día<br><input type="radio"/> Contesté auqi solo si su doctor nunca le recomendo hacer análisis de glucosa |

### MEDICAMENTO PARA LA DIABETES

|                                                                                                                                                                                                                                                                                                                                        |
|----------------------------------------------------------------------------------------------------------------------------------------------------------------------------------------------------------------------------------------------------------------------------------------------------------------------------------------|
| 11. ¿Cuántas inyecciones que le han sido recomendadas de insulina se puso en los últimos 7 días?<br><input type="radio"/> Todas <input type="radio"/> La mayoría <input type="radio"/> Algunas <input type="radio"/> Ninguna<br><input type="radio"/> No me inyecto insulina                                                           |
| 12. ¿Cuántas pastillas que le han sido recomendadas para el control de su diabetes tomó usted de las que se supone debería de tomar?<br><input type="radio"/> Todas <input type="radio"/> La mayoría <input type="radio"/> Algunas <input type="radio"/> Ninguna<br><input type="radio"/> No tomo pastillas para controlar mi diabetes |
